# Supplementary material
Source: publisher figshare collection journal article supplement (https://sage.figshare.com/ndownloader/files/17566292)
Supplement: Supplementary file 1 [file 17566292]

# **An Innovative Cyanoacrylate Device Developed to Improve the Current Standard of Care for Intravascular Catheter Securement**

## **Appendix 1: Test Articles and Product Descriptions**

- 1) Tegaderm™ I.V. Advanced 1683 manufactured by 3M™
  - A Transparent Film Dressing with Border that is 2.5" X 2.75" with an intended use to protect and secure intravascular catheters.
- 2) Tegaderm™ 9525HP manufactured by 3M™
  - A Transparent Film Dressing with Border that is 2.5" X 2.75" with an intended use to protect and secure BD Nexiva Catheter Systems.
- 3) Opsite™ Flexifix™ manufactured by Smith and Nephew
  - A Transparent Film Dressing with an intended use for fixation of tubing.
- 4) HubGuard® manufactured by Centurion® Medical Products Corp.
  - An adhesive-backed foam that is 3 3/8" X 3/4" with an intended use to securely anchor intravascular catheter.
- 5) Durapore™ manufactured by 3M™
  - A surgical tape with and intended use for securing tubing and devices.
- 6) Statlock® IV Ultra manufactured by C.R.Bard, Inc.
  - A stabilization device intended for use to secure catheters over the hub for non-winged catheters.
- 7) Histoacryl® manufactured by B.Braun Surgical
  - A topical skin adhesive intended for use for wound closure.
- 8) Dermabond Advanced™ manufactured by Ethicon™
  - A topical skin adhesive intended for use for wound closure.
